# Supplementary material for: Effects of Dietary Protein Levels on Bamei Pig Intestinal Colony Compositional Traits
Source: Hindawi journal article supplement (doi:10.1155/2020/2610431), 2020-01-01
Supplement: f1 [file 2610431.f1.pdf]

Table S1 Nutrient levels in basic diets<sup>②</sup>

| Project    | Control group       | Test I              | Test II             |
|------------|---------------------|---------------------|---------------------|
| DE (MJ/kg) | 13.14               | 13.13               | 13.11               |
| CP (%)     | 15.94 (16.00%)<br>③ | 14.00 (14.00%)<br>③ | 12.05 (12.00%)<br>③ |
| CF (%)     | 3.22                | 3.50                | 4.02                |
| Ca (%)     | 0.60                | 0.61                | 0.60                |
| P (%)      | 0.55                | 0.55                | 0.55                |
| Na+ (%)    | 0.16                | 0.16                | 0.17                |
| Cl- (%)    | 0.27                | 0.27                | 0.28                |
| SIDLys (%) | 0.86                | 0.86                | 0.86                |
| SIDMet (%) | 0.26                | 0.26                | 0.26                |
| SIDThr (%) | 0.59                | 0.59                | 0.59                |
| SIDTrp (%) | 0.19                | 0.19                | 0.19                |

Note: ① Added to the diet per kg of premix: Fe, 64.00 mg; Zn, 71.00 mg; Mn, 35.00 mg; Cu, 17.00 mg; Se, 0.36 mg; I, 0.64 mg; Vitamin A, 790 IU; Vitamin D3 135 IU; Vitamin E, 55.00 mg; Thiamine (Vitamin B1), 2.20 mg; Riboflavin (Vitamin B2), 2.50 mg; Biotin, 0.05 mg; Folic acid, 0.35 mg; Nicotinic acid, 29.00 mg; Calcium pantothenate, 27.00 mg Vitamin B6, 0.09 mg; Vitamin B 12, 1.00 mg; Choline, 5,000 mg; Flavoring agent, 3,000 mg; Sweetener, 3,000 mg; Phytase, 4,000 mg; Lysine, 30,000 mg; Tryptophan, 2,000 mg;

② Nutritional components are expressed as calculated values;

③ Test set value in brackets.

Table S2 Jejenum sample sequence statistics

| Group                     | Sample serial number | PE Reads    |        | Clean Tags  |        | Effective Tags |        | Effective (%) |       |
|---------------------------|----------------------|-------------|--------|-------------|--------|----------------|--------|---------------|-------|
|                           |                      | Jejunu<br>m | Cecum  | jejunu<br>m | Cecum  | Jejunu<br>m    | Cecum  | Jejunu<br>m   | Cecum |
| Control<br>group          | BKCG1/BMCG1          | 97,644      | 95,857 | 81,189      | 88,156 | 62,543         | 62,924 | 64.05         | 65.64 |
|                           | BKCG2/BMCG2          | 92,814      | 81,853 | 82,566      | 76,576 | 63,243         | 54,142 | 68.14         | 66.15 |
|                           | BKCG3/BMCG3          | 85,016      | 95,978 | 79,167      | 90,756 | 62,441         | 63,407 | 73.45         | 66.06 |
| Test I<br>BKG1/BMC<br>G1  | BKG11/BMCG11         | 97,213      | 91,096 | 81,053      | 83,811 | 67,312         | 60,700 | 69.24         | 66.63 |
|                           | BKG12/BMCG12         | 95,987      | 95,647 | 84,550      | 89,824 | 67,073         | 63,977 | 69.88         | 66.89 |
|                           | BKG13/BMCG13         | 99,623      | 82,905 | 91,840      | 77,267 | 66,283         | 61,474 | 66.53         | 74.15 |
| Test II<br>BKG2/BMC<br>G2 | BKG21/BMCG21         | 83,398      | 99,293 | 78,064      | 93,368 | 62,903         | 64,121 | 75.43         | 64.58 |
|                           | BKG22/BMCG22         | 98,771      | 82,758 | 91,246      | 77,831 | 60,806         | 60,644 | 61.56         | 73.28 |
|                           | BKG23/BMCG23         | 96,985      | 94,664 | 90,396      | 90,042 | 66,871         | 61,047 | 68.95         | 64.49 |
